# Supplementary material
Source: PubMed Central journal article supplement (PMC2539069)
Supplement: NIHMS62717-supplement-1File001.pdf [file NIHMS62717-supplement-1File001.pdf]

## SUPPORTING INFORMATION

### **5'-O-[(N-Acyl)sulfamoyl]adenosines as Antitubercular Agents that Inhibit MbtA: An Aryl Adenylating Enzyme Required for Siderophore Biosynthesis of the Mycobactins**

*Chunhua Qiao,<sup>a</sup> Amol Gupte<sup>a</sup>, Helena I. Boshoff,<sup>b</sup> Daniel J. Wilson,<sup>a</sup> Eric M. Bennett,<sup>a</sup> Ravindranadh V. Somu,<sup>a</sup> Clifton E. Barry III,<sup>b</sup> Courtney C. Aldrich<sup>a\*</sup>*

*<sup>a</sup>Center for Drug Design, University of Minnesota, Minneapolis, Minnesota 55455, <sup>b</sup>Tuberculosis Research Section, National Institute of Allergy and Infectious Diseases, Bethesda, Maryland 20892.*

---

**HPLC Purity of Inhibitors.** HPLC purity was determined by two methods using a Varian Microsorb MV 100-5 C18 column (4.6 × 150 mm, 5 μm particle size) with detection at 254 nm and the indicated HPLC conditions (Methods A–E) as described below.

**HPLC Conditions:**

Solvent A: 50 mM aqueous triethylammonium bicarbonate (TEAB) buffer.

Solvent B1: CH<sub>3</sub>CN/H<sub>2</sub>O (9:1)

Solvent B2: CH<sub>3</sub>CN/H<sub>2</sub>O (7:3)

Flowrate: 0.5 mL/min.

Detection 254 ± 4 nm

HPLC column: Varian Microsorb MV 100-5 C18 250 × 4.6 mm

**HPLC Methods:**

*Method A:* 0–25 min: gradient 5%–100% B1; isocratic 25–29 min: 100% B1

*Method B:* 0–20 min: gradient 20%–80% B1; isocratic 20–25 min: 80 % B1

*Method C:* 0–30 min: gradient 2%–100% B1; isocratic 30–34 min: 100% B1

*Method D:* 0–25 min: gradient 5%–100% B2; isocratic 25–28 min: 100% B2; 28–33 min: gradient 100%–5% B2; 33–35 min: isocratic 5% B2.

*Method E:* 0–20 min: gradient 20%–80% B2; isocratic 20–26 min: 80% B2; 26–28 min: gradient 80%–20% B2; 28–37 min: isocratic 20% B2.

**Table S1.** HPLC Purity of Inhibitors

| Compound Number | Method | t <sub>ret</sub> (min) | Purity (%) |
|-----------------|--------|------------------------|------------|
| 9               | D      | 15.6                   | 96.2       |
|                 | E      | 15.0                   | 95.8       |
| 10              | D      | 14.8                   | 97.2       |
|                 | E      | 15.5                   | 96.9       |
| 11              | D      | 15.7                   | 98.5       |
|                 | E      | 15.0                   | 99.1       |
| 12              | D      | 12.5                   | 98.5       |
|                 | E      | 14.4                   | 97.9       |
| 13              | D      | 15.8                   | 98.5       |
|                 | E      | 15.0                   | 99.1       |
| 14              | D      | 13.7                   | 97.9       |
|                 | E      | 15.1                   | 98.3       |
| 15              | A      | 14.2                   | 95.9       |
|                 | B      | 16.0                   | 98.9       |
| 16              | A      | 13.6                   | 95.1       |
|                 | B      | 17.4                   | 95.2       |
| 17              | A      | 16.6                   | 99.0       |
|                 | B      | 16.1                   | 98.9       |
| 18              | A      | 10.8                   | 97.7       |
|                 | B      | 10.4                   | 97.6       |
| 19              | D      | 14.8                   | 99.2       |
|                 | E      | 12.9                   | 98.9       |
| 20              | D      | 12.8                   | 99.0       |
|                 | E      | 11.4                   | 98.7       |
| 23              | D      | 14.3                   | 98.7       |
|                 | E      | 13.8                   | 98.1       |
| 24              | D      | 14.5                   | 98.4       |
|                 | E      | 12.5                   | 99.0       |
| 25              | D      | 13.2                   | 97.5       |
|                 | E      | 12.6                   | 97.8       |
| 26              | A      | 9.81                   | 98.4       |
|                 | C      | 7.44                   | 99.0       |
| 27              | A      | 15.8                   | 97.6       |
|                 | B      | 10.5                   | 95.5       |
| 28              | A      | 16.1                   | 95.9       |
|                 | B      | 11.4                   | 95.3       |
| 29              | A      | 15.7                   | 98.8       |
|                 | B      | 10.7                   | 97.3       |
| 30              | A      | 15.1                   | 98.5       |
|                 | B      | 10.6                   | 98.7       |
| 31              | A      | 15.7                   | 98.3       |
|                 | B      | 10.4                   | 95.8       |
| 32              | A      | 17.5                   | 99.7       |
|                 | B      | 12.8                   | 98.3       |
| 58              | A      | 15.8                   | 99.1       |
|                 | B      | 10.8                   | 98.3       |
| 63              | A      | 21.9                   | 95.4       |
|                 | B      | 15.9                   | 96.3       |
